# Supplementary material
Source: PubMed Central journal article supplement (PMC5728309)

| Antigen     | Species | Clone/Fluorochrome      | Source                                                                  | Reference     |
|-------------|---------|-------------------------|-------------------------------------------------------------------------|---------------|
| CD123       | Human   | 9F5-PE                  | BD Pharmingen                                                           |               |
| CXCR4       | Human   | 12G5-APC                | BD Pharmingen                                                           |               |
| Ter119      | Mouse   | PE                      | BD Pharmingen                                                           |               |
| CD123       | Mouse   | 5B11-Alexa Fluor 647    | AbD Serotec                                                             |               |
| CD123       | Mouse   | 5B11-APC                | eBioscience                                                             |               |
| CXCR4       | Mouse   | L276F12-Alexa Fluor 647 | Biolegend                                                               |               |
| CD34        | Human   | 581-BV421               | BD Horizon                                                              |               |
| CD38        | Human   | H0B7 PECy7              | BD Pharmingen                                                           |               |
| CD90        | Human   | 5E10-Biotin             | BD Pharmingen                                                           |               |
| CD123       | Human   | 7G3                     | Antibody Services, Walter and Eliza Hall Institute Biotechnology Centre | <sup>38</sup> |
| IgG control | Human   | IgG                     | Antibody Services, Walter and Eliza Hall Institute Biotechnology Centre |               |

Figure S1

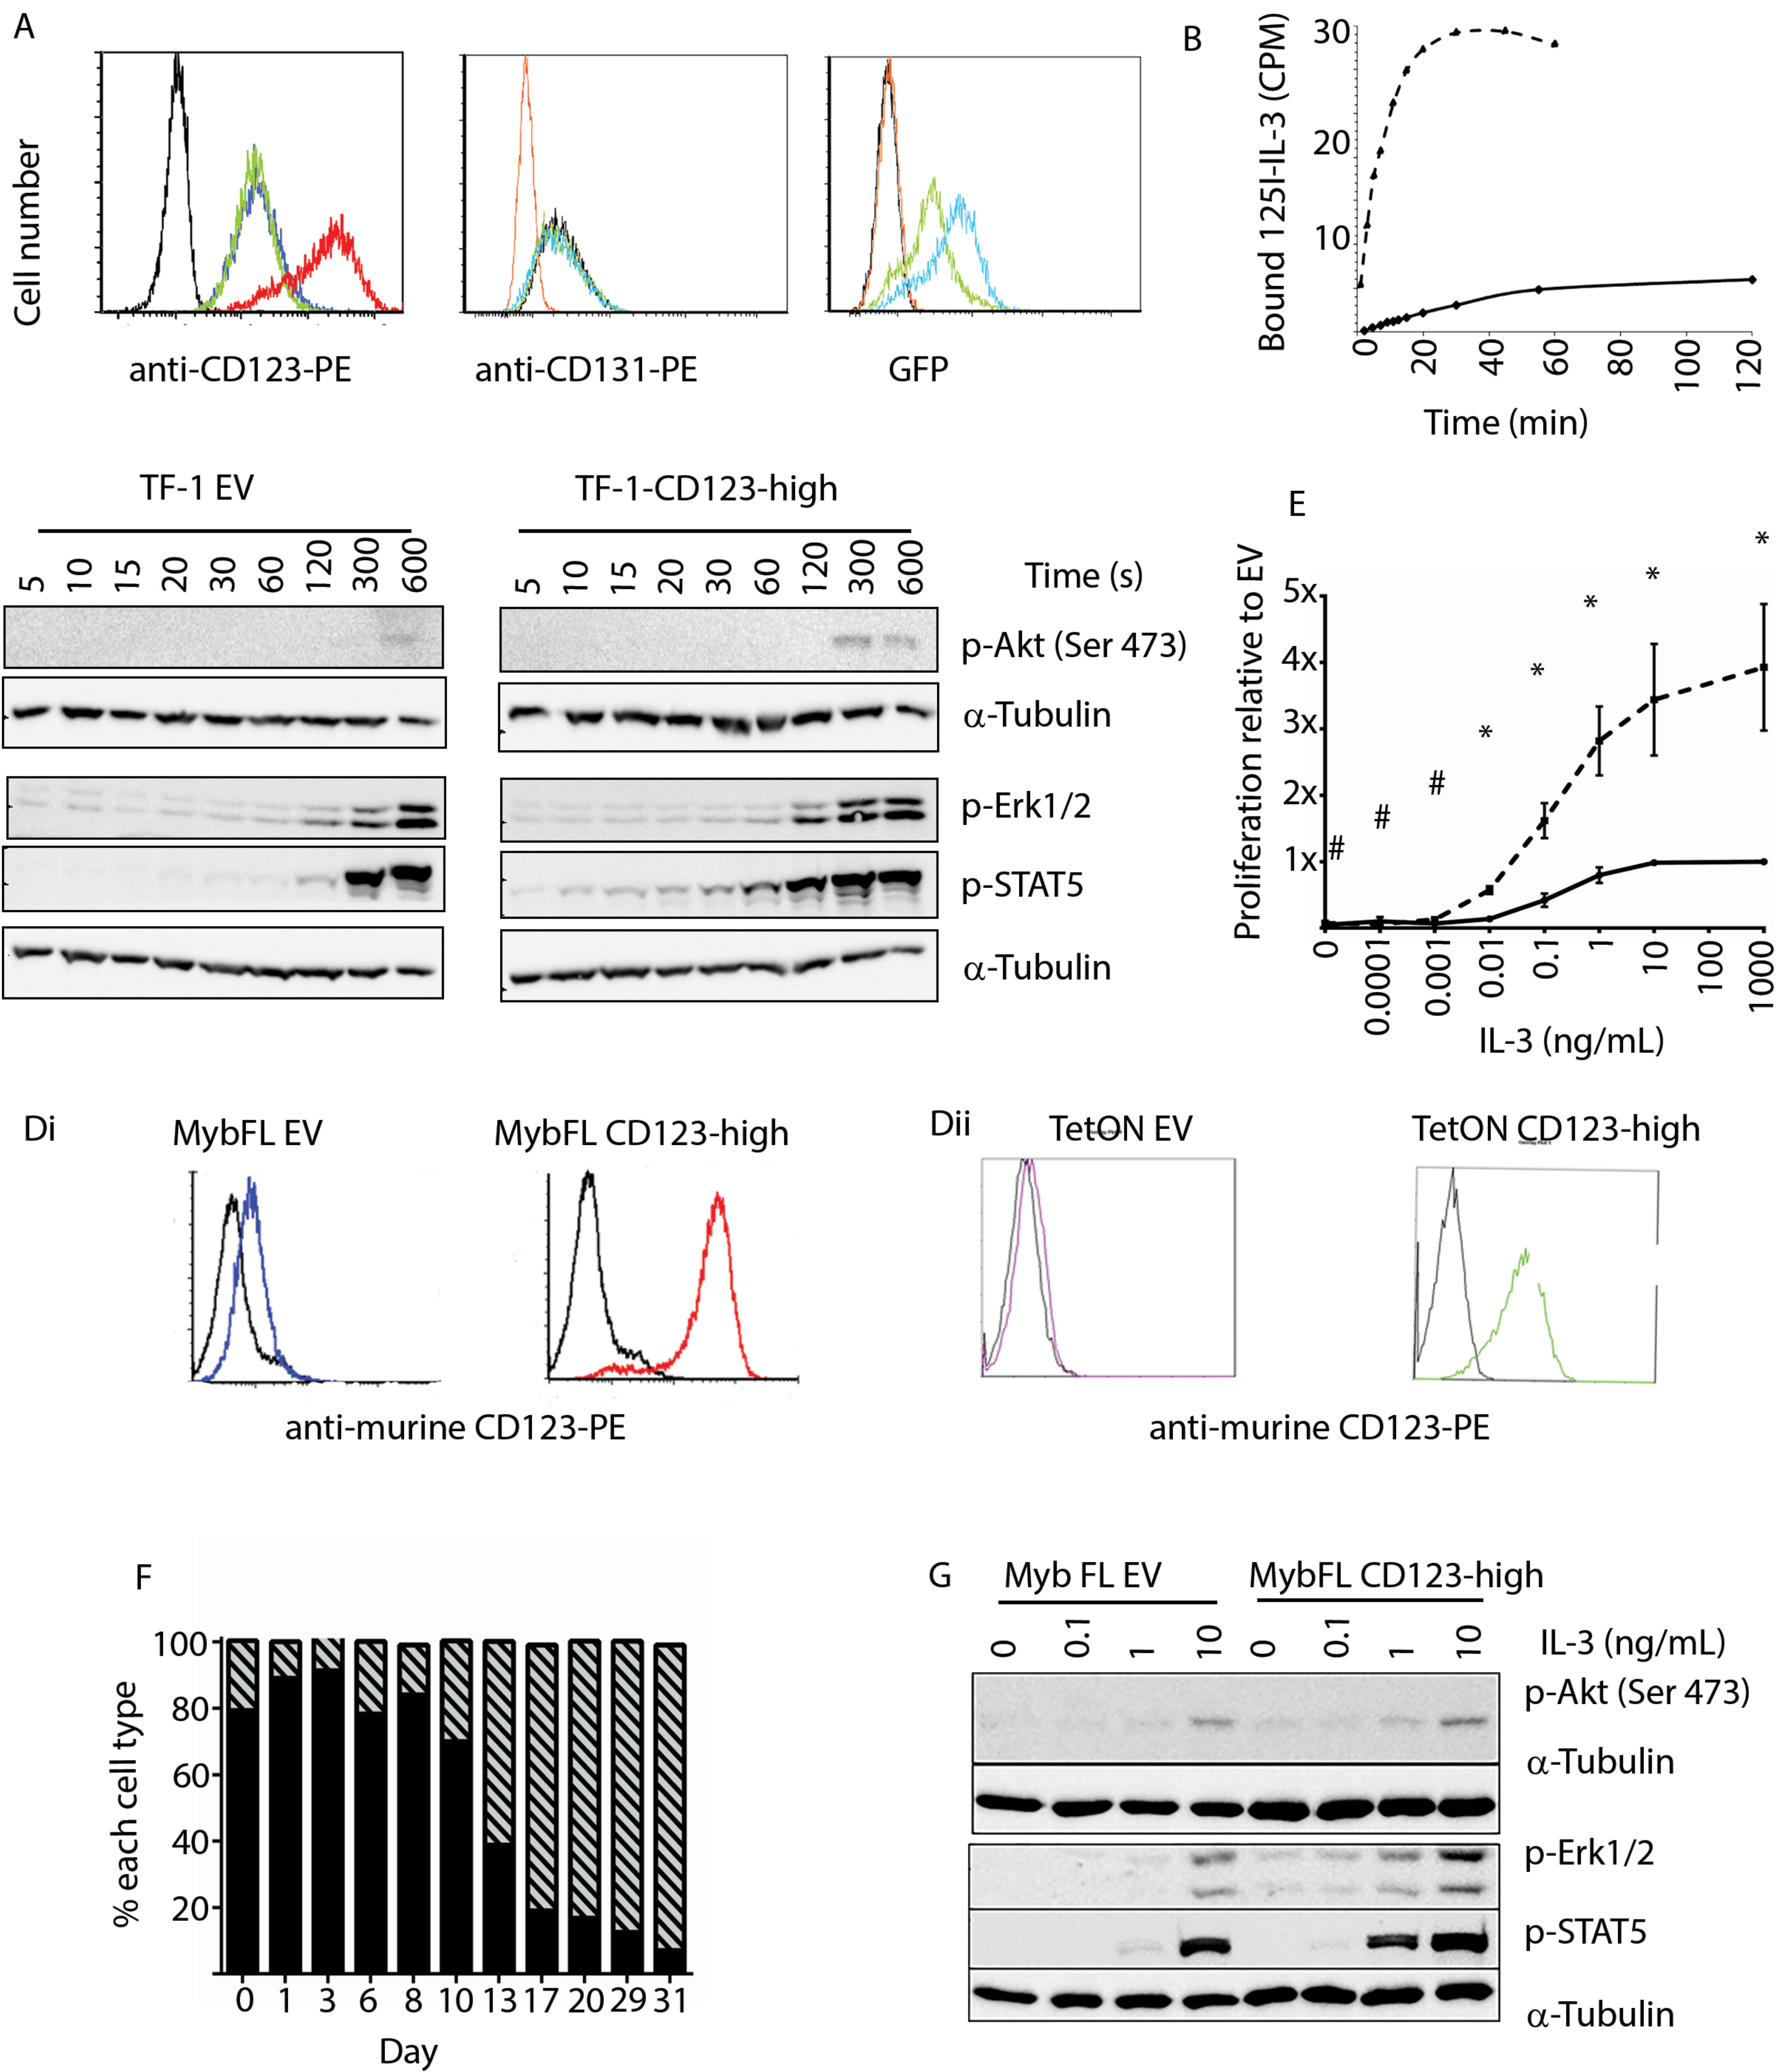

Figure S2

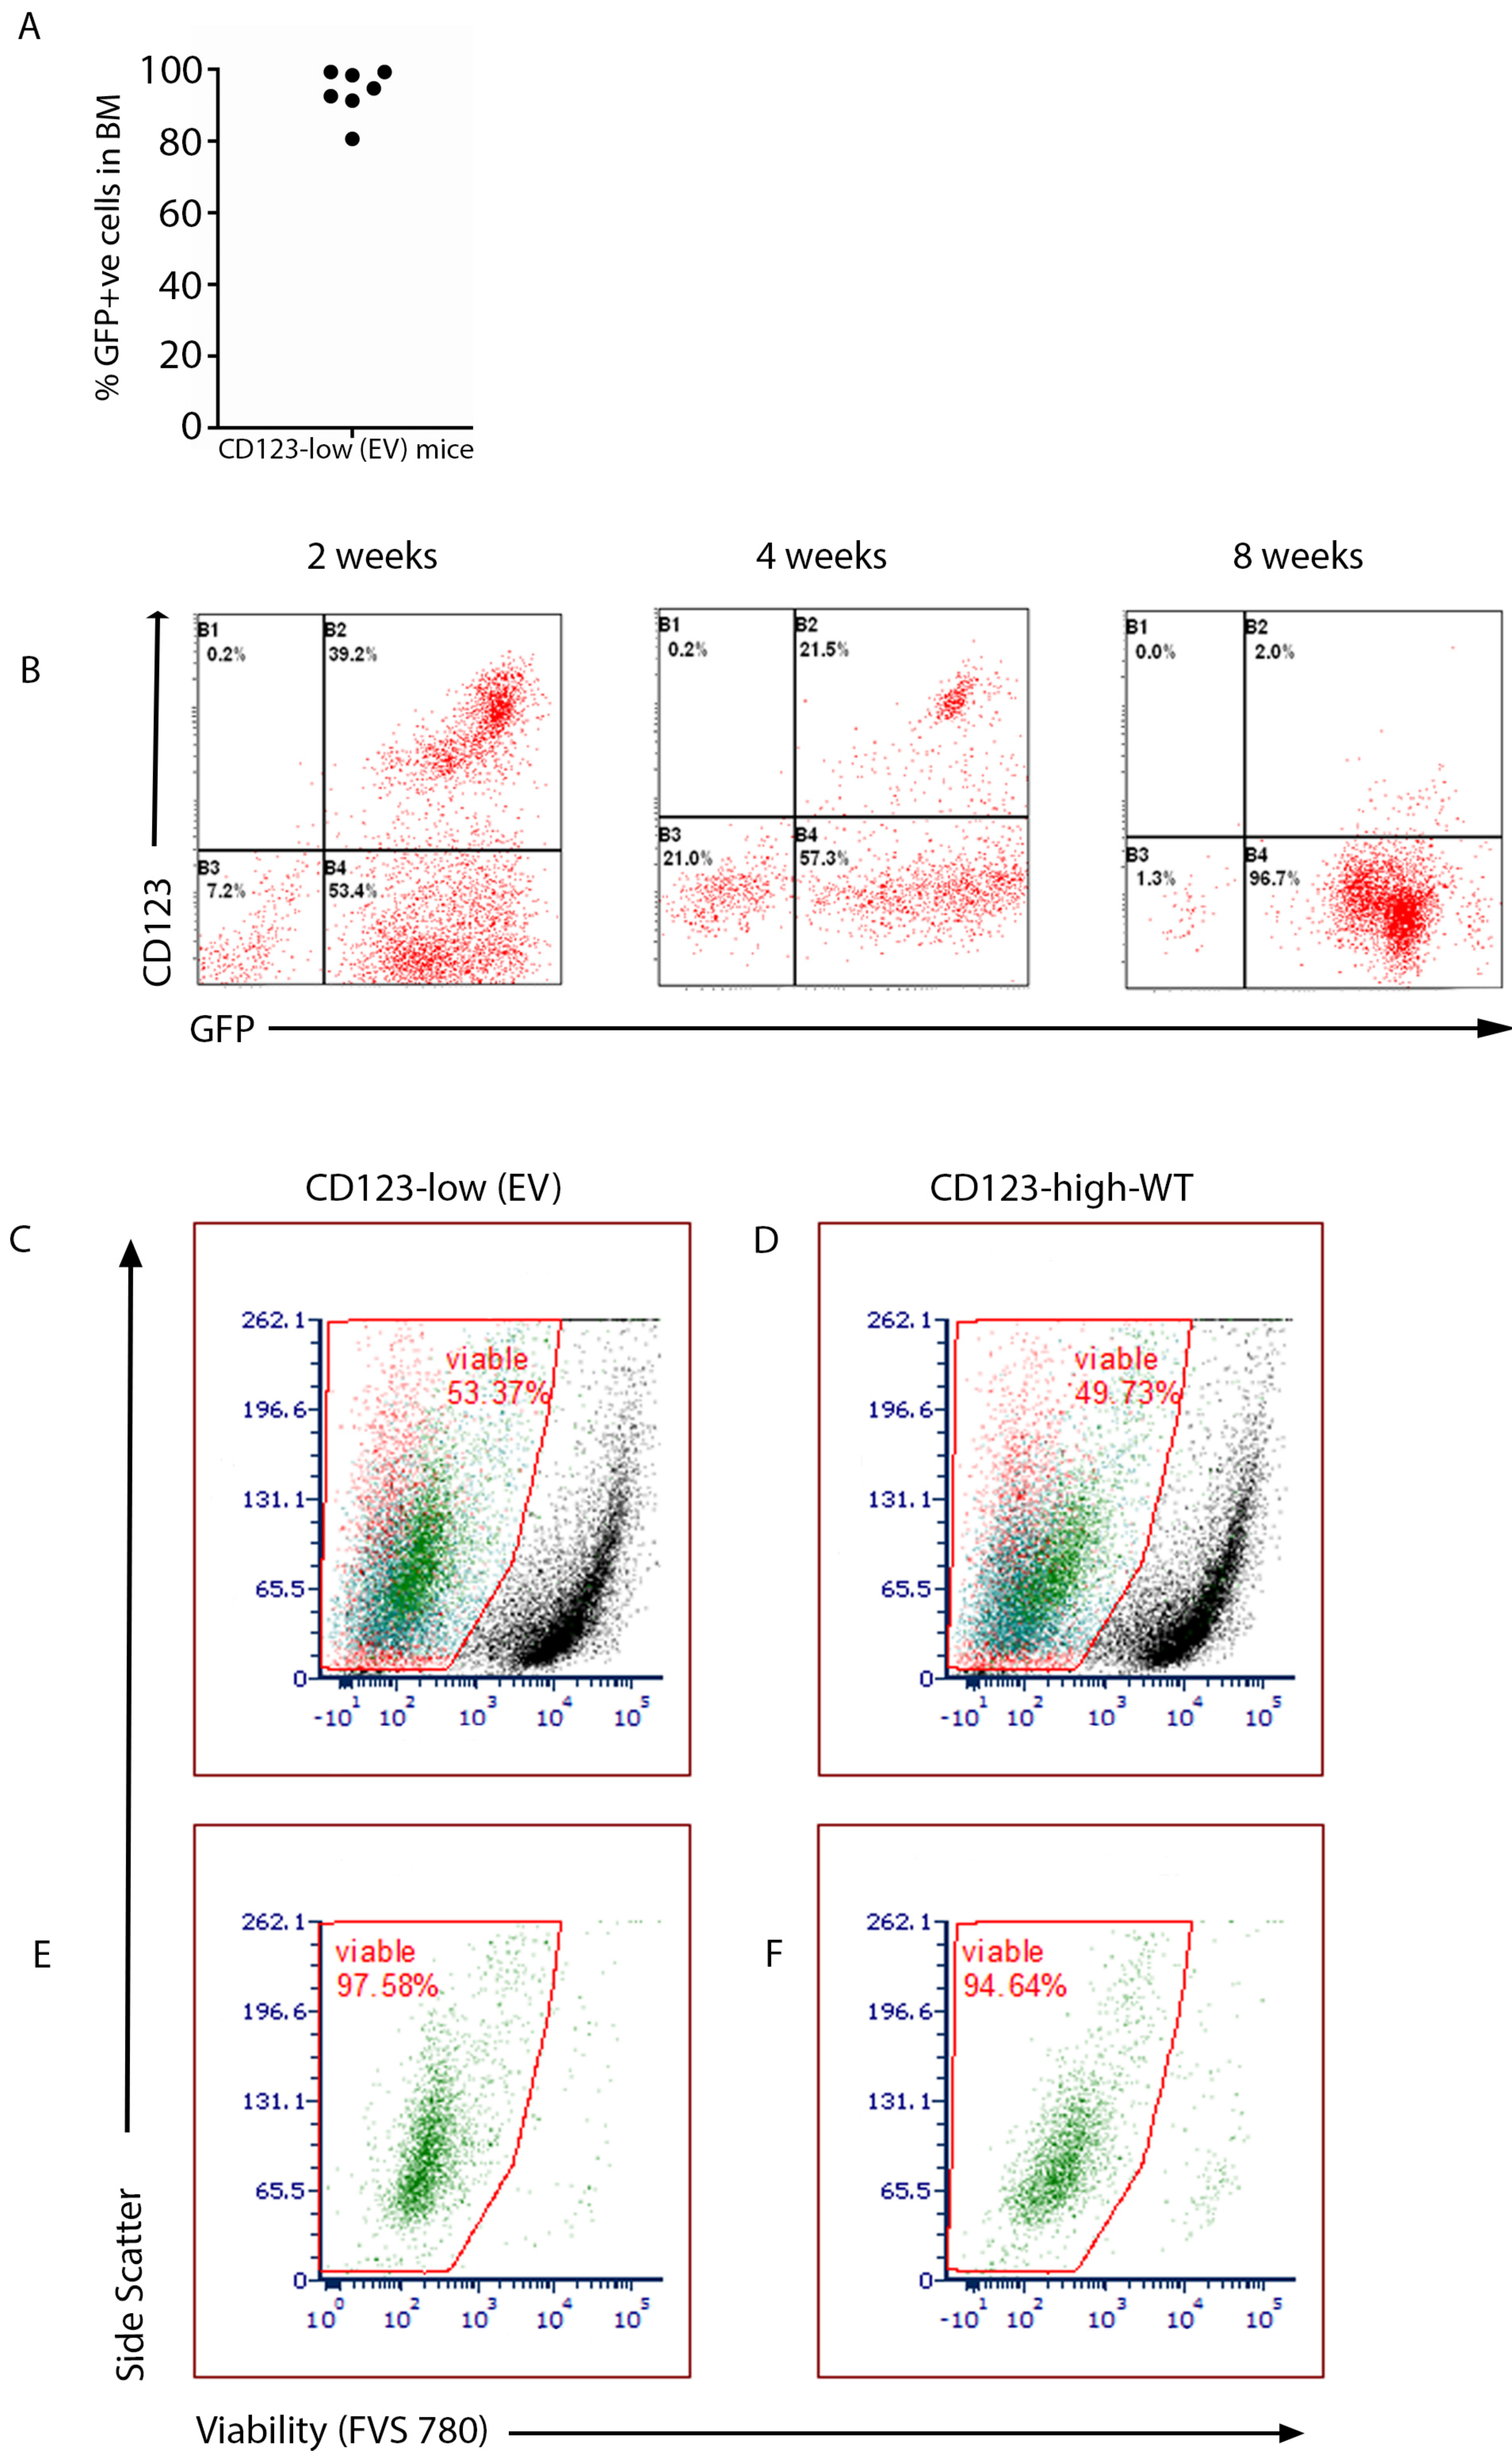

Figure S3

A

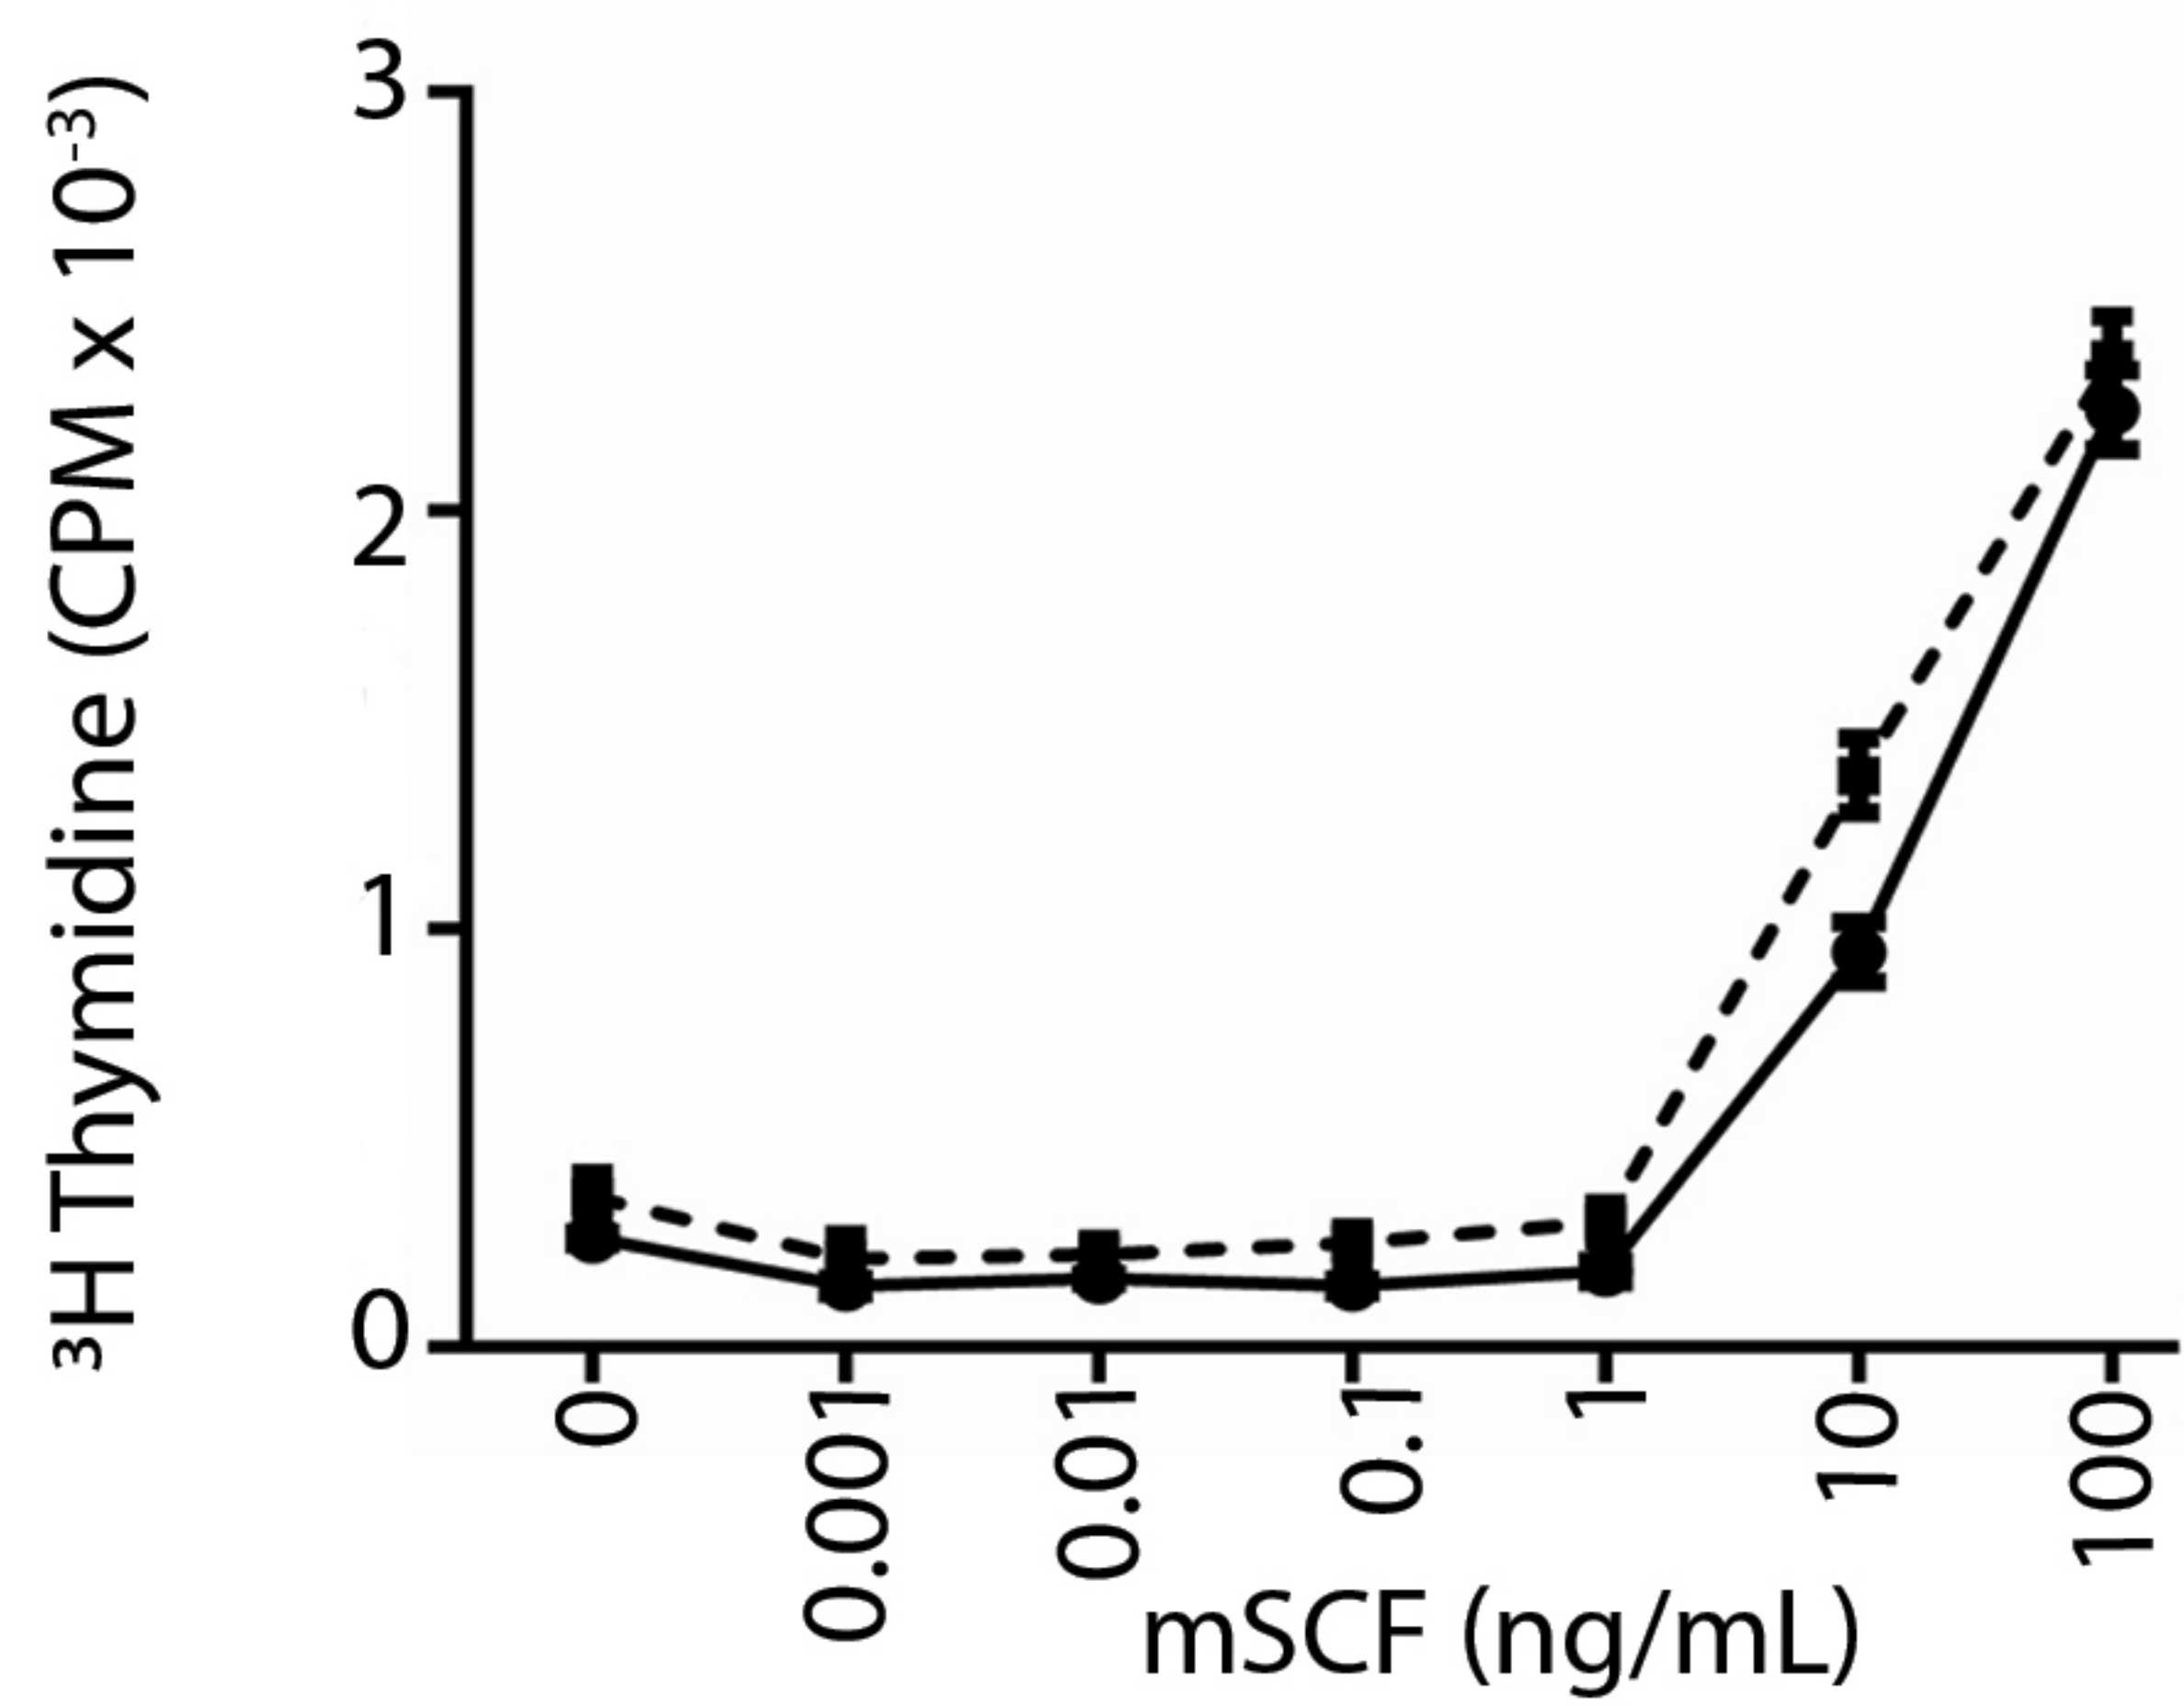

B

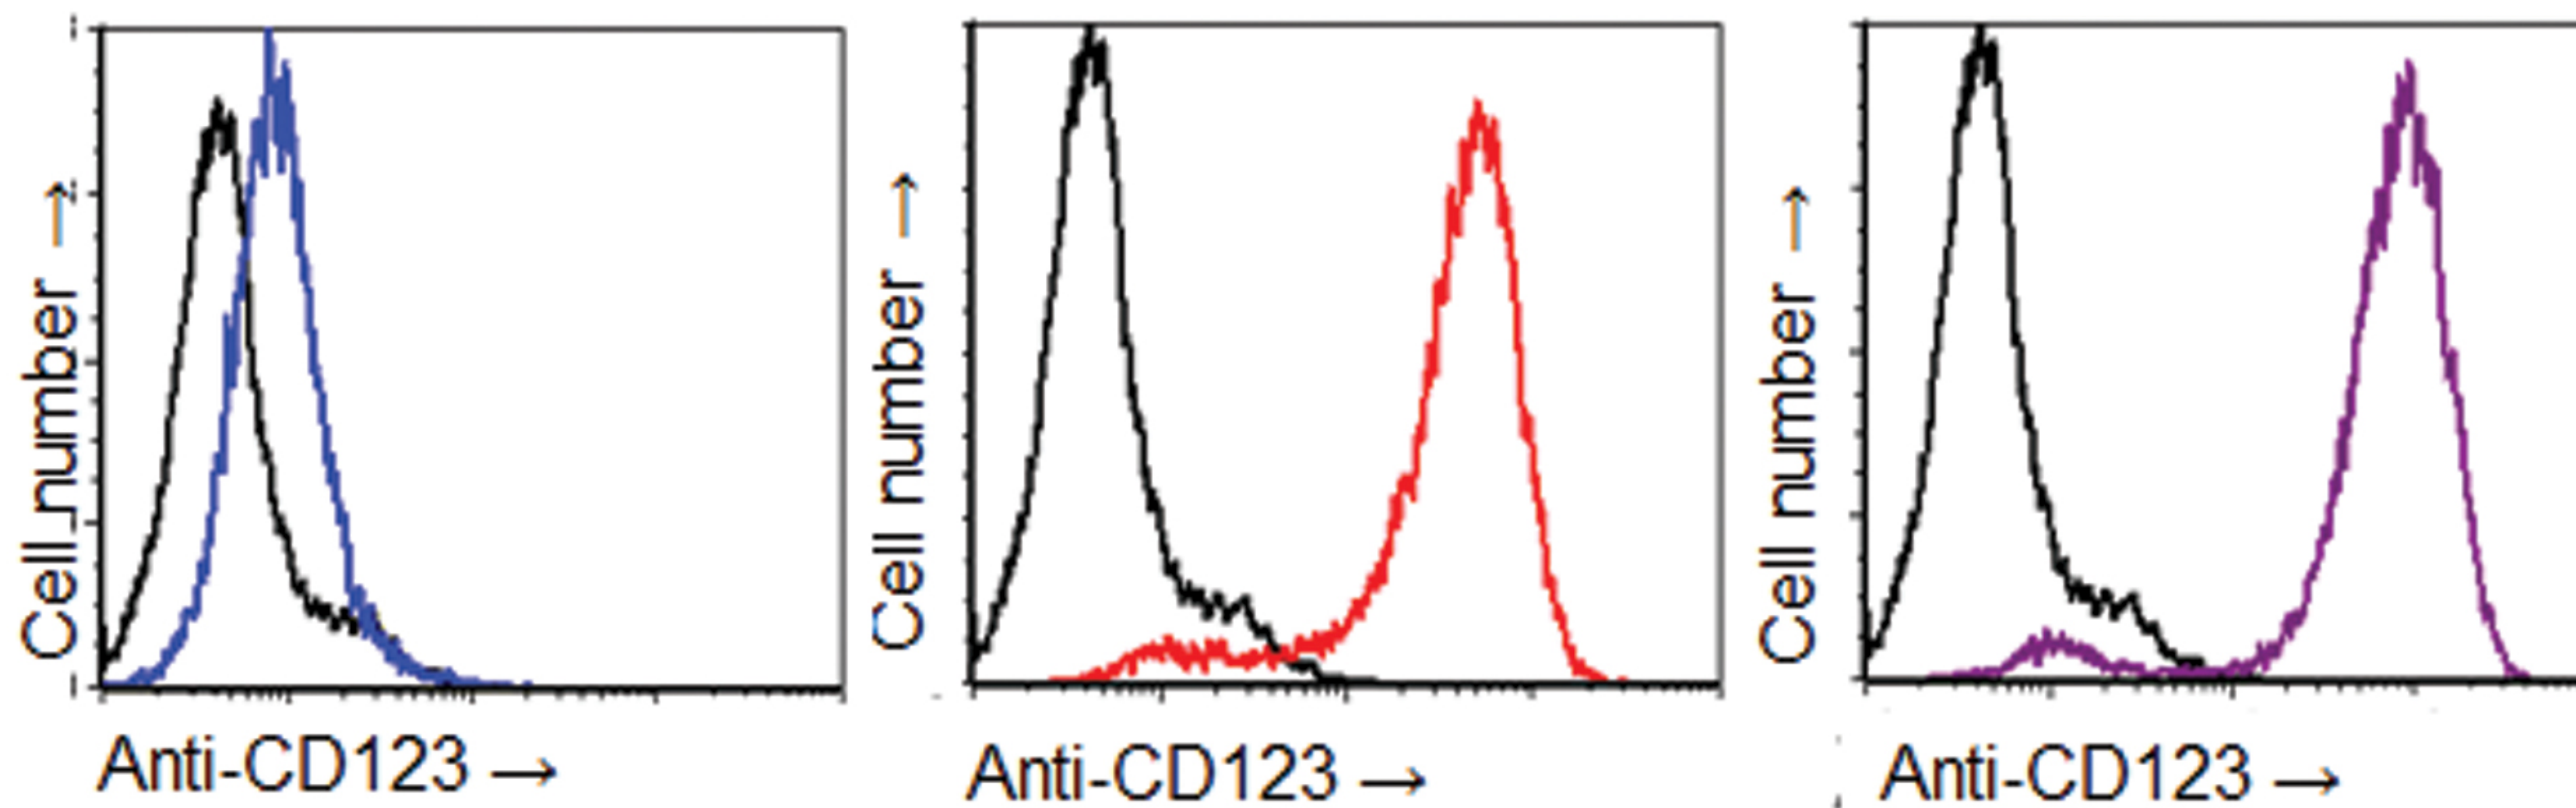

Figure S4

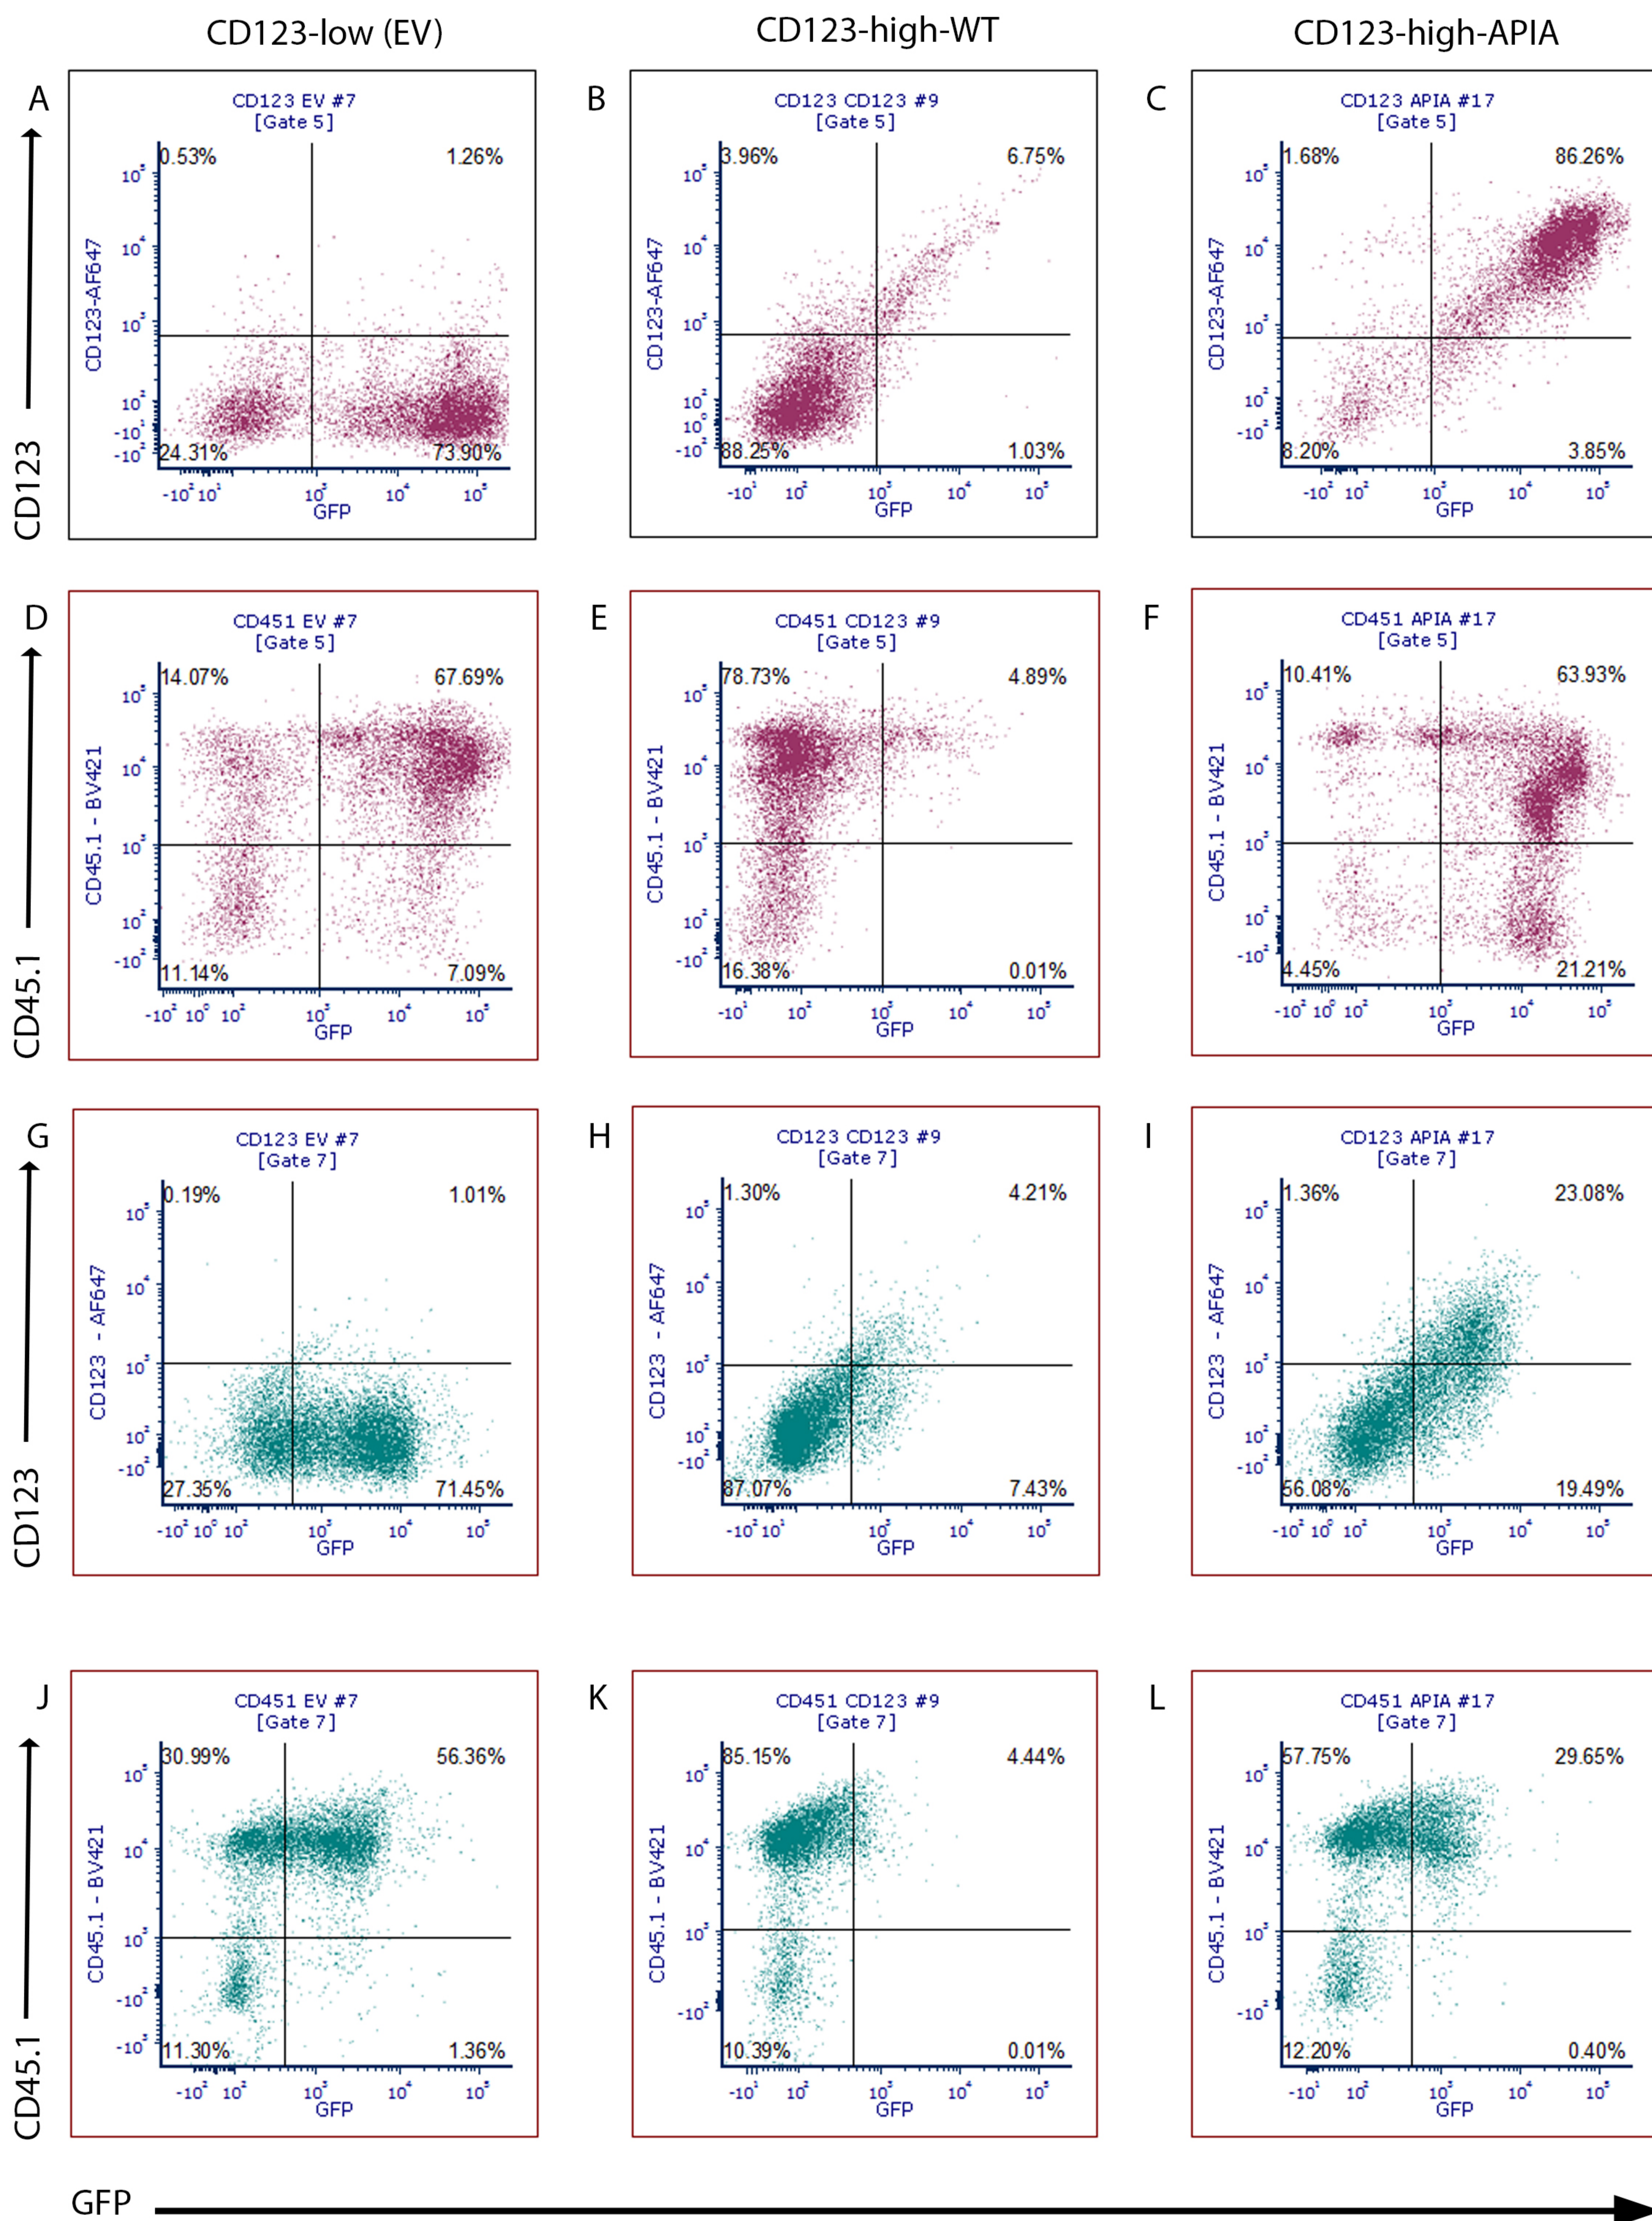

Figure S5

Ai

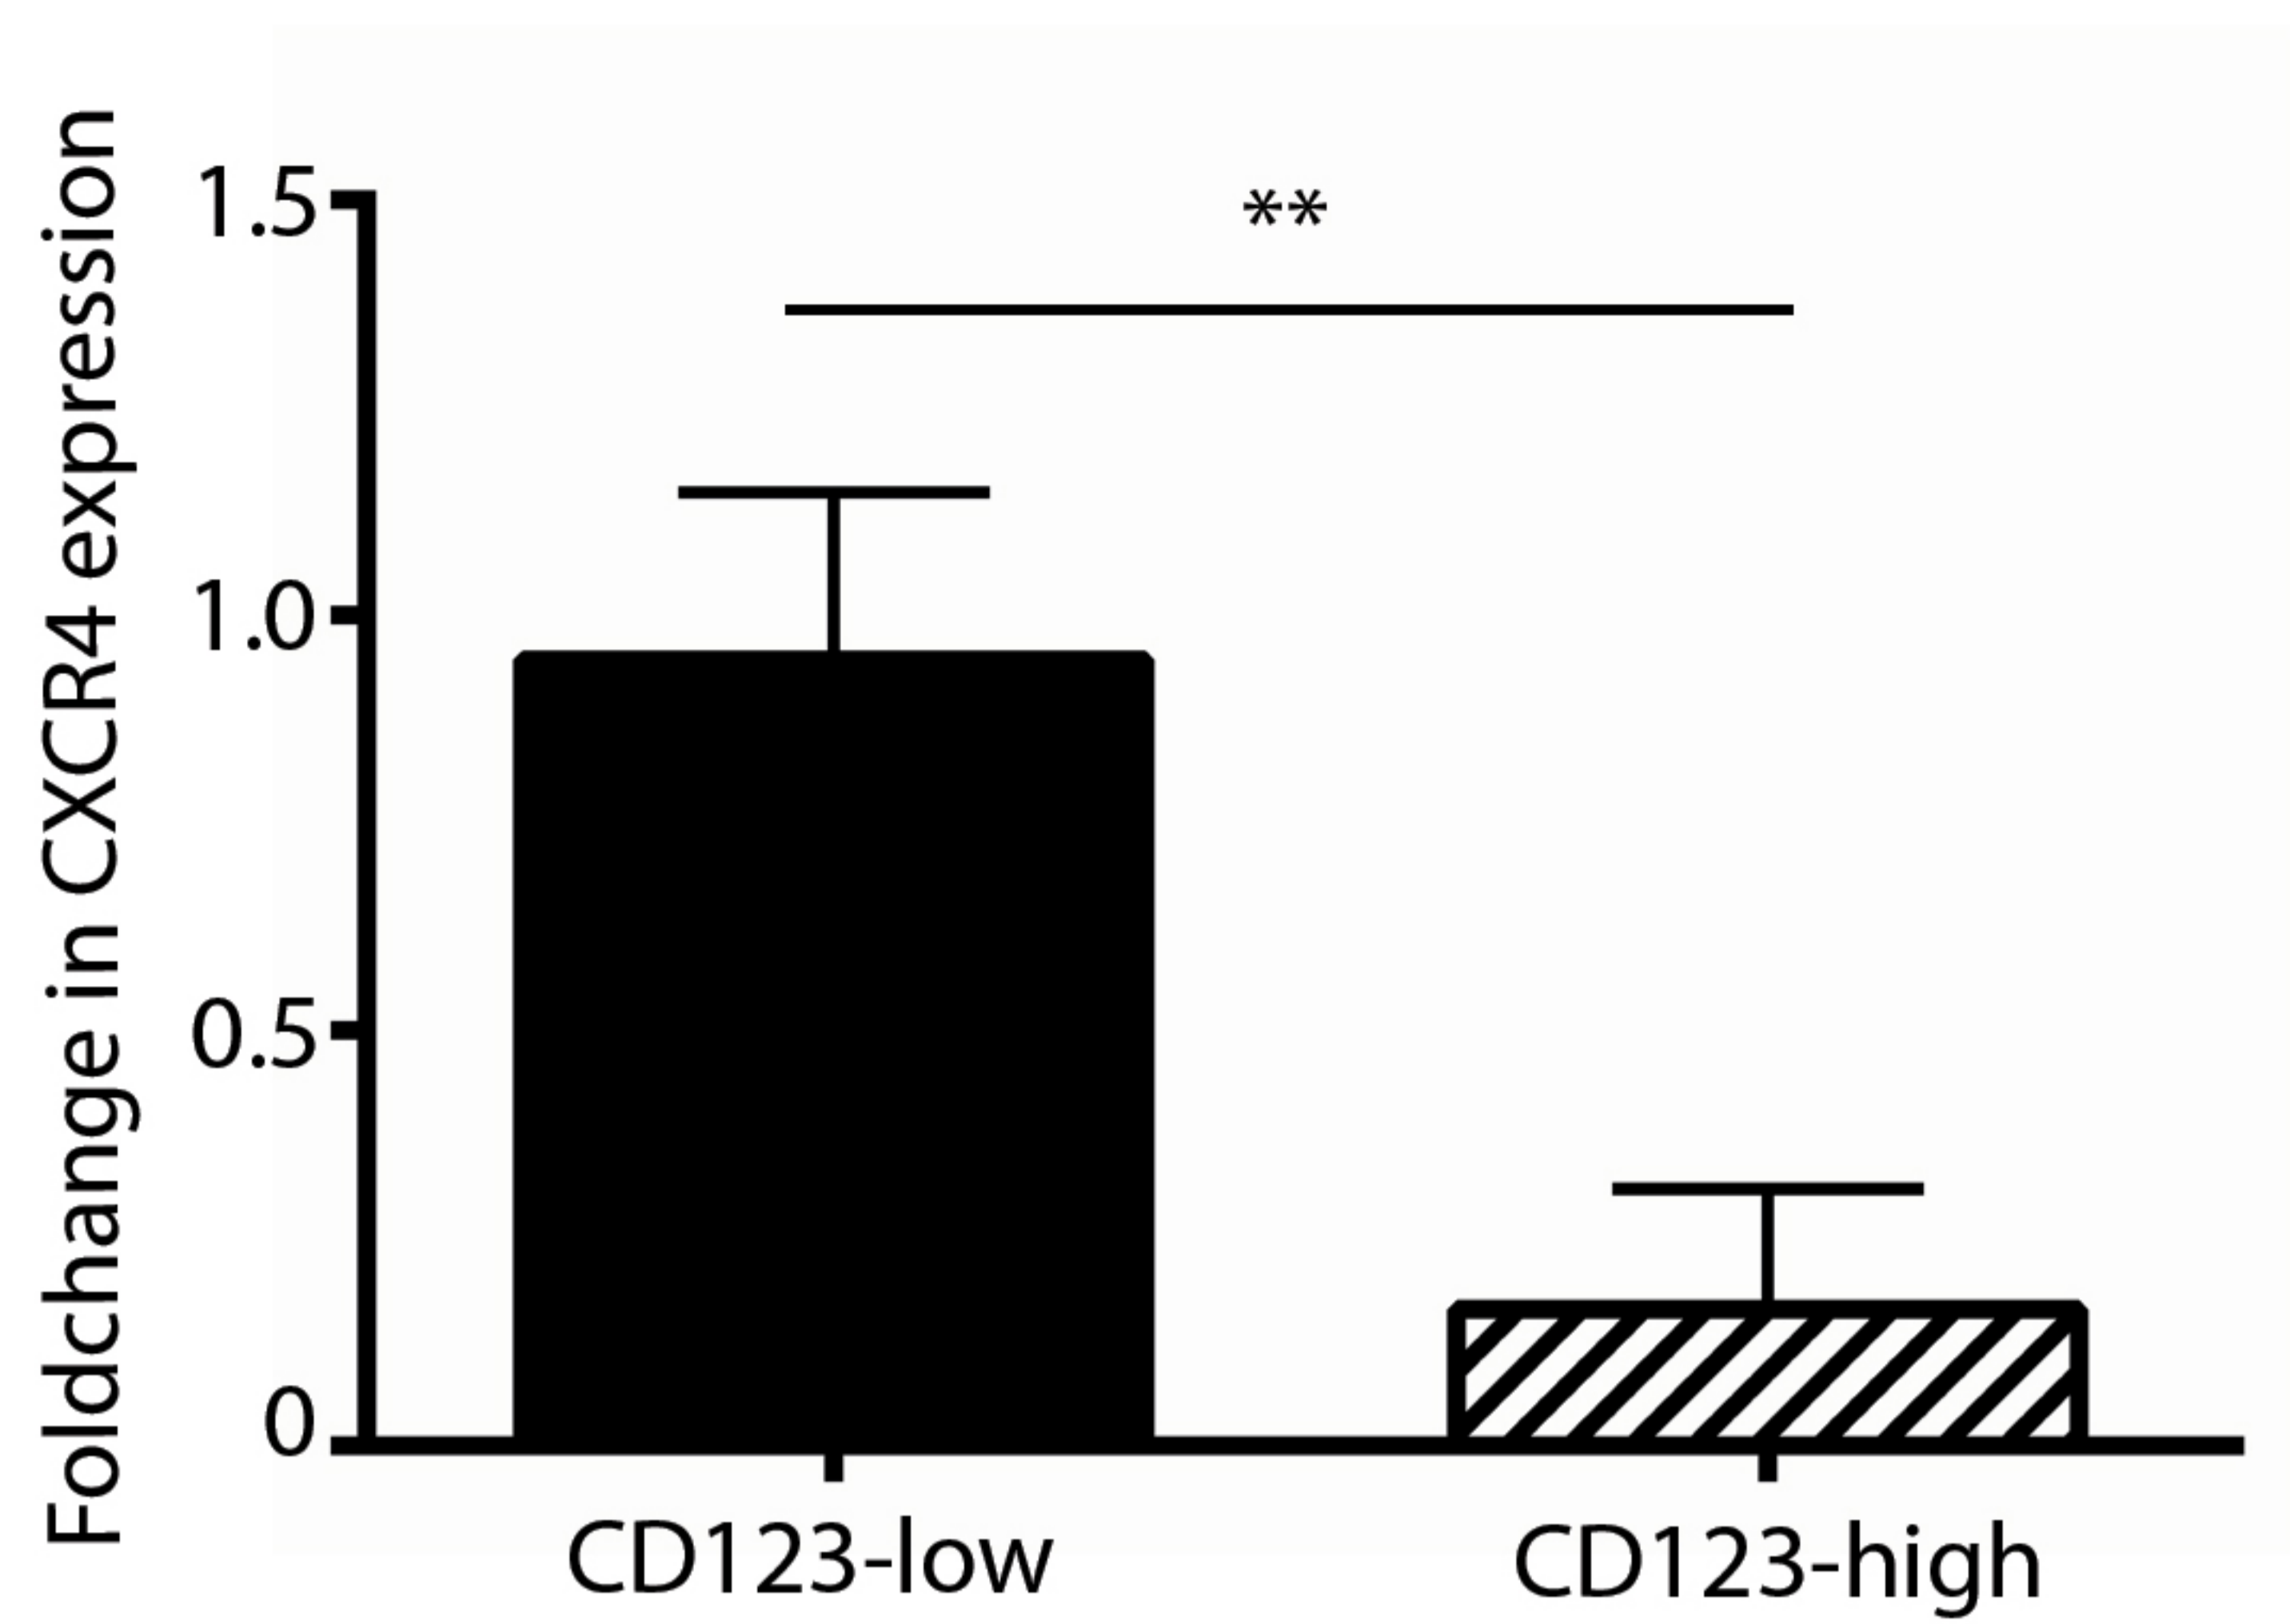

Aii

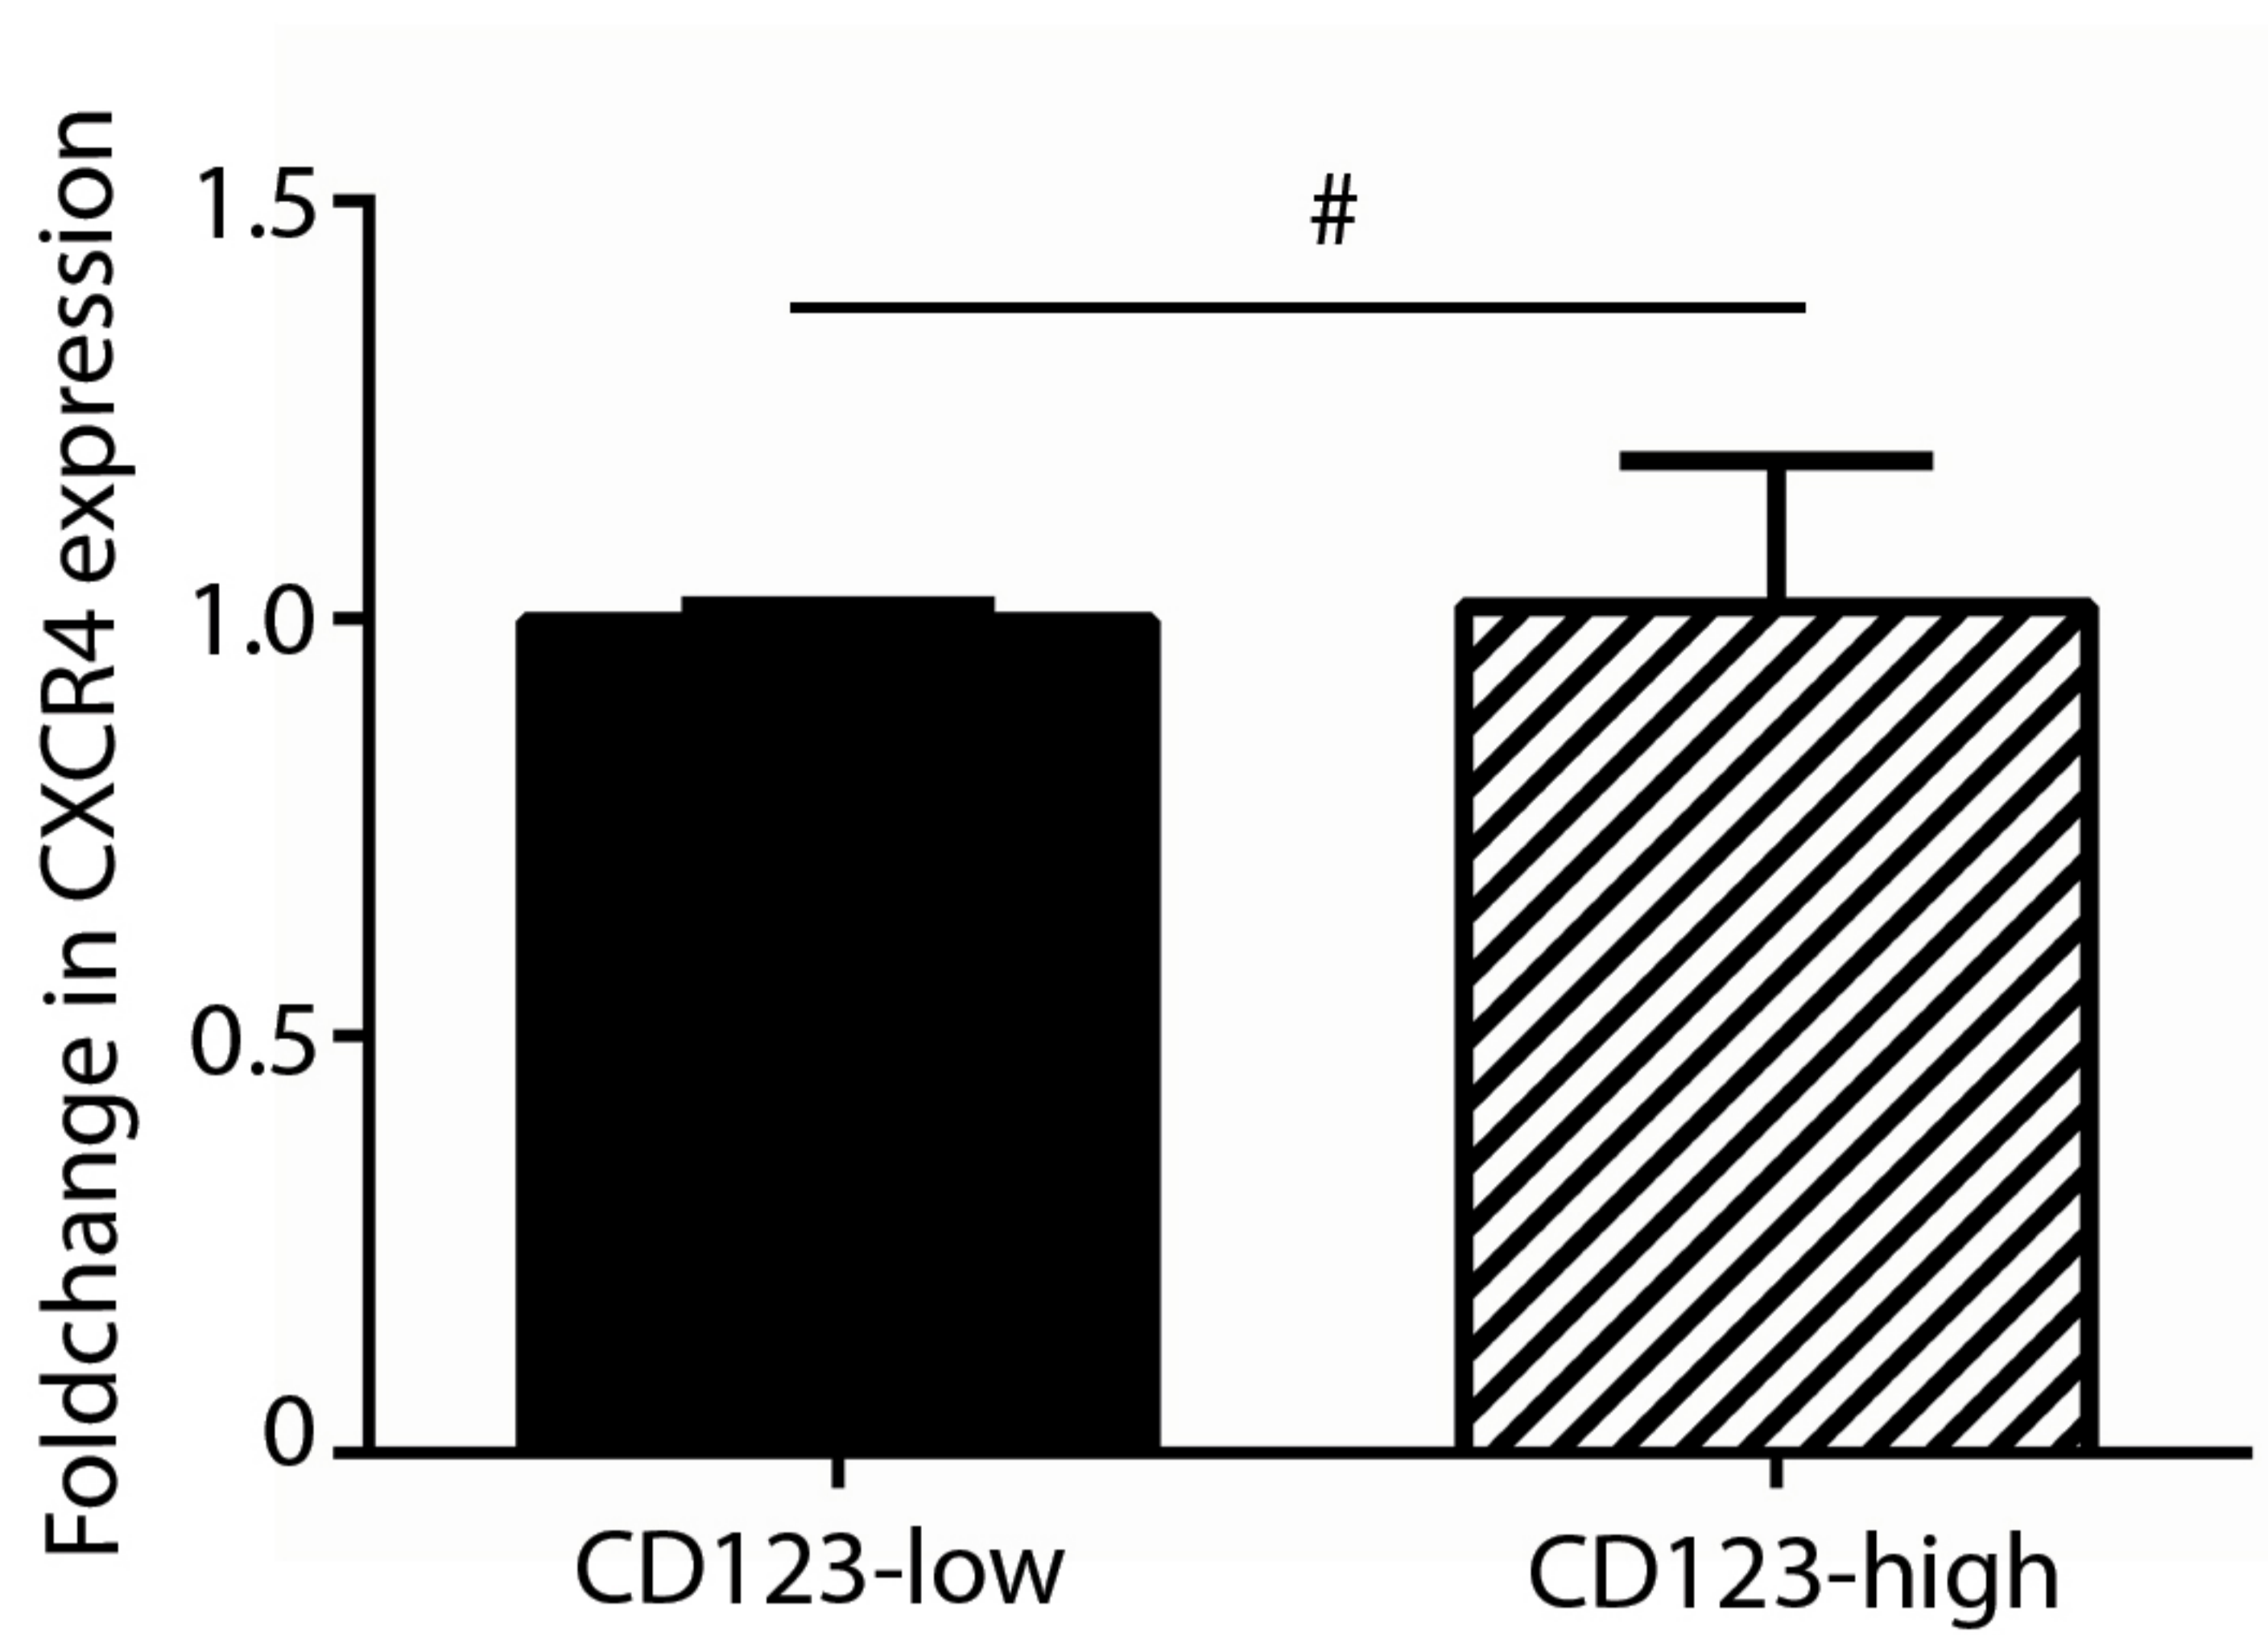

Supplement: ba002931-suppl1.pdf [file ba002931-suppl1.pdf]
